# Supplementary material for: DNA fragility at topologically associated domain boundaries is promoted by alternative DNA secondary structure and topoisomerase II activity
Source: PubMed Central journal article supplement — Nucleic Acids Res. 2024 Mar 7;52(7):3837–55. doi: 10.1093/nar/gkae164 (PMC11040008; doi:10.1093/nar/gkae164), 2024-03-07
Supplement: gkae164_supplemental_file.pdf [file gkae164_supplemental_file.pdf]

## **Supplementary Materials**

Table S1. Sequencing and alignment statistics for paired-end Illumina sequencing libraries prepared from MCF10A cells.

Table S2. Sequencing and alignment statistics for paired-end Illumina sequencing libraries prepared from Jurkat cells.

Table S3. Summary of publicly available data used in this study.

Table S4. Summary of CTCF ChIP-seq binding sites (all sites or CTCF motif-containing sites) for each cell line used in this study.

Figure S1. Reproducibility of genome-wide DSB mapping/sequencing in MCF10A and Jurkat cells

Figure S2. DSBs are significantly enriched at strong CTCF binding sites in five cell types, and strong alternative DNA secondary structures are also significantly present at these sites.

Figure S3. Strong CTCF binding sites are enriched for DSBs and shared between cell lines.

Figure S4. Distribution of strong (top 10%) and weak (bottom 10%) CTCF binding sites among genic and intergenic sites do not explain DSB enrichment.

Figure S5. No differences in gene expression were observed among genic CTCF binding sites binned by CTCF binding strength, and gene expression does not cause increased DSBs in strong CTCF binding sites.

Figure S6. DSBs are enriched at strong, but not weak, CTCF binding sites in a dose-dependent manner after exposure to etoposide.

Figure S7. Etoposide treatment decreases CTCF expression in MCF10A cells while increasing damage markers.

Figure S8. Validation of lost, gained, and unchanged CTCF binding sites in shCTCF and shLuc MCF10A cells by CTCF ChIP-qPCR.

Figure S9. TAD boundary-associated CTCF binding sites are enriched for DSBs, G-quadruplexes, and TOP2 binding compared to loop-associated CTCF binding sites.

Figure S10. TAD boundary-associated CTCF binding sites are enriched among strong CTCF binding sites and are enriched for DSBs compared to loop-associated CTCF binding sites.

Table S1. Sequencing and alignment statistic for DSB paired-end Illumina sequencing libraries prepared from MCF10A cells.

| Treatment        | Replicates |           | # Sequenced read pairs <sup>a</sup> | % Alignment rate <sup>b</sup> | # Proper read pairs <sup>c</sup> | % Duplication <sup>d</sup> | # Mapped DSBs <sup>e</sup> | % Mapped DSBs <sup>f</sup> |
|------------------|------------|-----------|-------------------------------------|-------------------------------|----------------------------------|----------------------------|----------------------------|----------------------------|
|                  | Biological | Technical |                                     |                               |                                  |                            |                            |                            |
| UT               | N1         | 1         | 6647933                             | 91.58                         | 5797063                          | 9.95                       | 4791320                    | 72.07                      |
|                  | N2         | 1         | 20619652                            | 72.44                         | 9750389                          | 29.98                      | 6476801                    | 31.41                      |
|                  | N3         | 1         | 11973646                            | 91.07                         | 10105182                         | 35.68                      | 5916836                    | 49.42                      |
|                  | N4         | 1         | 11162025                            | 95.25                         | 10041620                         | 12.83                      | 7783827                    | 69.73                      |
|                  |            | 2         | 11068591                            | 95.63                         | 10027803                         | 12.52                      | 7805911                    | 70.52                      |
| 0.15 $\mu$ M ETO | N1         | 1         | 15731579                            | 86.53                         | 12840923                         | 43.32                      | 6214941                    | 39.51                      |
|                  | N2         | 1         | 28738165                            | 82.23                         | 22148286                         | 67.43                      | 6146314                    | 21.39                      |
|                  | N3         | 1         | 11998194                            | 91.20                         | 10073548                         | 36.32                      | 5886143                    | 49.06                      |
|                  | N4         | 1         | 11174549                            | 96.04                         | 10214225                         | 27.50                      | 6452374                    | 57.54                      |
|                  |            | 2         | 10686941                            | 95.94                         | 9748291                          | 26.42                      | 6278009                    | 58.74                      |
| 15 $\mu$ M ETO   | N1         | 1         | 15873188                            | 87.97                         | 13208864                         | 29.14                      | 8221660                    | 51.80                      |
|                  | N2         | 1         | 20199989                            | 91.29                         | 17170220                         | 62.57                      | 5610764                    | 27.78                      |
|                  | N3         | 1         | 15946006                            | 71.46                         | 10280992                         | 50.84                      | 4446327                    | 27.88                      |
|                  | N4         | 1         | 9773149                             | 94.56                         | 8567131                          | 30.94                      | 5080006                    | 51.98                      |
|                  |            | 2         | 9274183                             | 94.92                         | 8189631                          | 29.71                      | 4966564                    | 53.55                      |
| shLuc            | N1         | 1         | 16426275                            | 92.86                         | 14626110                         | 34.90                      | 8568137                    | 52.16                      |
|                  | N2         | 2         | 17277728                            | 93.88                         | 15560475                         | 24.38                      | 10656435                   | 61.68                      |
| shCTCF           | N1         | 1         | 13178237                            | 93.18                         | 11707603                         | 36.78                      | 6892369                    | 52.30                      |
|                  | N2         | 2         | 15076213                            | 92.16                         | 13277674                         | 27.57                      | 8969817                    | 59.50                      |

<sup>a</sup> Number of raw paired read1 and read2 following Illumina paired-end sequencing and quality filtering.

<sup>b</sup> Percentage of reads that had at least one alignment to the hg38 genome assembly as processed and reported by bowtie2 alignment tool.

<sup>c</sup> Following the quality control removal of all unmapped, non-primary, supplementary, and low-quality reads, the remaining number of paired read1 and read2 are indicated.

<sup>d</sup> PCR duplicates are marked and removed meaningfully using read1 and read2 alignment, and “% Duplication” is based on original “# Sequenced read pairs”.

<sup>e</sup> For each non-duplicated pair, only read1 is kept, and the 5' most nucleotide of read1 that defines the DNA break position.

<sup>f</sup> “% Mapped DSBs” was calculated by dividing “# Mapped DSBs” by “# Sequenced read pairs”.

Table S2. Sequencing and alignment statistic for DSB paired-end Illumina sequencing libraries prepared from Jurkat cells.

| Cell type | Biological replicates | # Sequenced read pairs <sup>a</sup> | % Alignment rate <sup>b</sup> | # Proper read pairs <sup>c</sup> | % Duplication <sup>d</sup> | # Mapped DSBs <sup>e</sup> | % Mapped DSBs <sup>f</sup> |
|-----------|-----------------------|-------------------------------------|-------------------------------|----------------------------------|----------------------------|----------------------------|----------------------------|
| Jurkat    | N1                    | 14449233                            | 90.43                         | 12111851                         | 57.68                      | 4555910                    | 31.53                      |
|           | N2                    | 21158037                            | 94.39                         | 18842415                         | 43.01                      | 9793050                    | 46.29                      |
|           | N3                    | 24864775                            | 93.87                         | 21898447                         | 47.91                      | 10328841                   | 41.54                      |
|           | N4                    | 30315964                            | 41.56                         | 11968089                         | 10.63                      | 9964927                    | 32.87                      |
|           | N5                    | 16859985                            | 94.70                         | 14987915                         | 44.69                      | 7572104                    | 44.91                      |

<sup>a</sup> Number of raw paired read1 and read2 following Illumina paired-end sequencing and quality filtering.

<sup>b</sup> Percentage of reads that had at least one alignment to the hg38 genome assembly as processed and reported by bowtie2 alignment tool.

<sup>c</sup> Following the quality control removal of all unmapped, non-primary, supplementary, and low-quality reads, the remaining number of paired read1 and read2 are indicated.

<sup>d</sup> PCR duplicates are marked and removed meaningfully using read1 and read2 alignment, and “% Duplication” is based on original “# Sequenced read pairs”.

<sup>e</sup> For each non-duplicated pair, only read1 is kept, and the 5’ most nucleotide of read1 that defines the DNA break position.

<sup>f</sup> “% Mapped DSBs” was calculated by dividing “# Mapped DSBs” by “# Sequenced read pairs”.

Table S3. Summary of publicly available data used in this study.

| Species / Cell Line         | Data Type      | Accession        | Reference                           |
|-----------------------------|----------------|------------------|-------------------------------------|
| <i>H. sapiens</i> / GM12878 | CTCF ChIP-seq  | ENCSR000AKB      | ENCODE                              |
|                             | RNA-seq        | SRR1153470       | Tilgner <i>et al.</i>               |
| <i>H. sapiens</i> / GM13069 | DSB Mapping    | PRJNA497476      | Szlachta <i>et al.</i>              |
| <i>H. sapiens</i> / HaCaT   | BG4 ChIP-seq   | GSE99205         | Hansel-Hertsch <i>et al.</i> (2018) |
| <i>H. sapiens</i> / HeLa    | CTCF ChIP-seq  | ENCSR000A0A      | ENCODE                              |
|                             | RNA-seq        | GSE95452         | Tchasovnikarova <i>et al.</i>       |
|                             | DSB Mapping    | PRJNA579071      | Singh <i>et al.</i>                 |
| <i>H. sapiens</i> / Jurkat  | CTCF ChIP-seq  | GSE68976         | Hnisz <i>et al.</i>                 |
| <i>H. sapiens</i> / K562    | BG4 ChIP-seq   | GSE107690        | Mao <i>et al.</i>                   |
| <i>H. sapiens</i> / MCF10A  | CTCF ChIP-seq  | GSE98551         | Fritz <i>et al.</i>                 |
|                             | CTCF ChIP-seq  | GSE183381        | Lebeau <i>et al.</i>                |
|                             | RNA-seq        | GSE45258         | Kang <i>et al.</i>                  |
|                             | TOP2B ChIP-seq | SRR5136803       | Dellino <i>et al.</i>               |
| <i>H.sapiens</i> / NHEK     | BG4 ChIP-seq   | GSE76688         | Hansel-Hertsch <i>et al.</i> (2016) |
| <i>H. sapiens</i> / NPC     | CTCF ChIP-seq  | GSM3498323       | ENCODE                              |
|                             | RNA-seq        | PRJNA591220      | Michel <i>et al.</i>                |
|                             | DSB Mapping    | PRJNA542485      | Szlachta <i>et al.</i>              |
| <i>H. sapiens</i> / RPE-1   | CTCF ChIP-seq  | SRR299281/604593 | ENCODE                              |
|                             | CC-seq         | SRP187576        | Gittens <i>et al.</i>               |
| <i>H.sapiens</i> / U2OS     | BG4 CUT&Tag    | GSE181373        | Hui <i>et al.</i>                   |

Table S4. Summary of CTCF ChIP-seq binding sites (all sites or CTCF motif-containing sites) for each cell line used in this study.

| Cell line                                      | GM12878 | HeLa   | MCF10A | NPC    | Jurkat |
|------------------------------------------------|---------|--------|--------|--------|--------|
| CTCF ChIP-seq binding peaks*                   | 40,191  | 69,117 | 60,115 | 98,416 | 68,203 |
| CTCF ChIP-seq binding peaks with CTCF motifs** | 35,288  | 53,864 | 48,781 | 69,117 | 55,931 |
| % ChIP-seq peaks with CTCF motifs              | 87.8    | 77.9   | 81.1   | 70.2   | 82.0   |

\* The publicly available data (Table S3) for CTCF ChIP-seq from GM12878, HeLa, MCF10A, NPC, and Jurkat, and each associated input data, were downloaded and aligned to the GRCh38/hg38 genome using bowtie2 (v 2.3.4.1). Binding peaks were called by the macs2 tool (v 2.2.9.1) using the default setting with each dataset controlled for the matching input data (-c).

\*\*BEDtools (v 2.27.1) intersect between called CTCF ChIP-seq peaks and a list of determined genome-wide CTCF motifs (n = 887,981) (Fang *et al.* 2020) was performed, and CTCF binding peaks were refined by excluding the binding sites that lack CTCF motifs

**A**

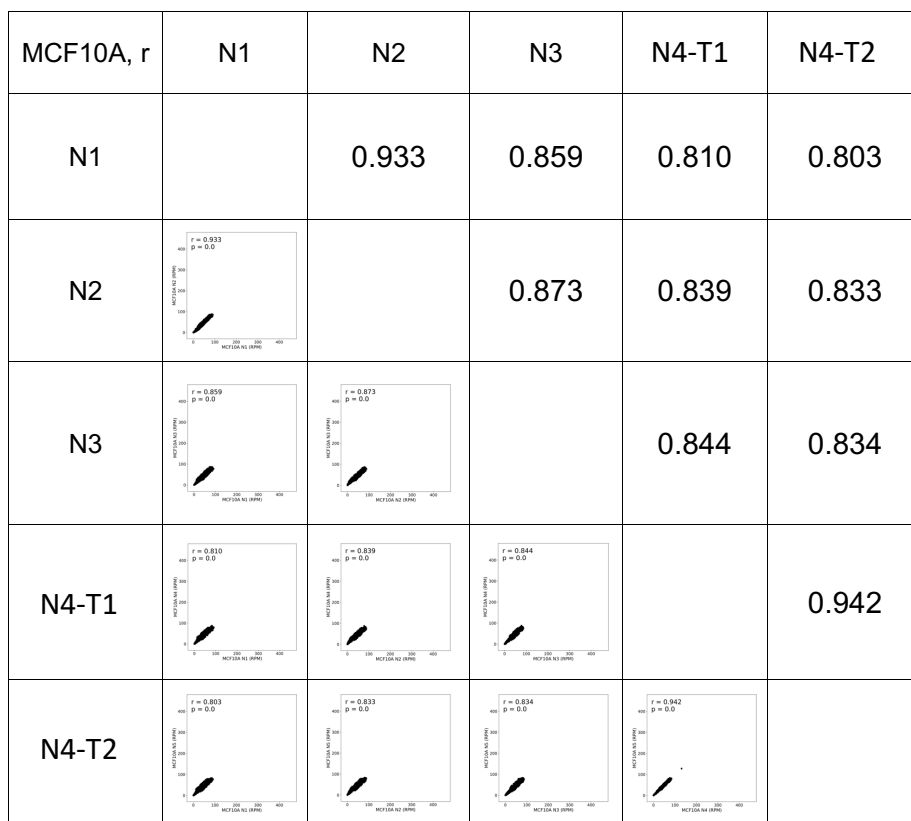

**B**

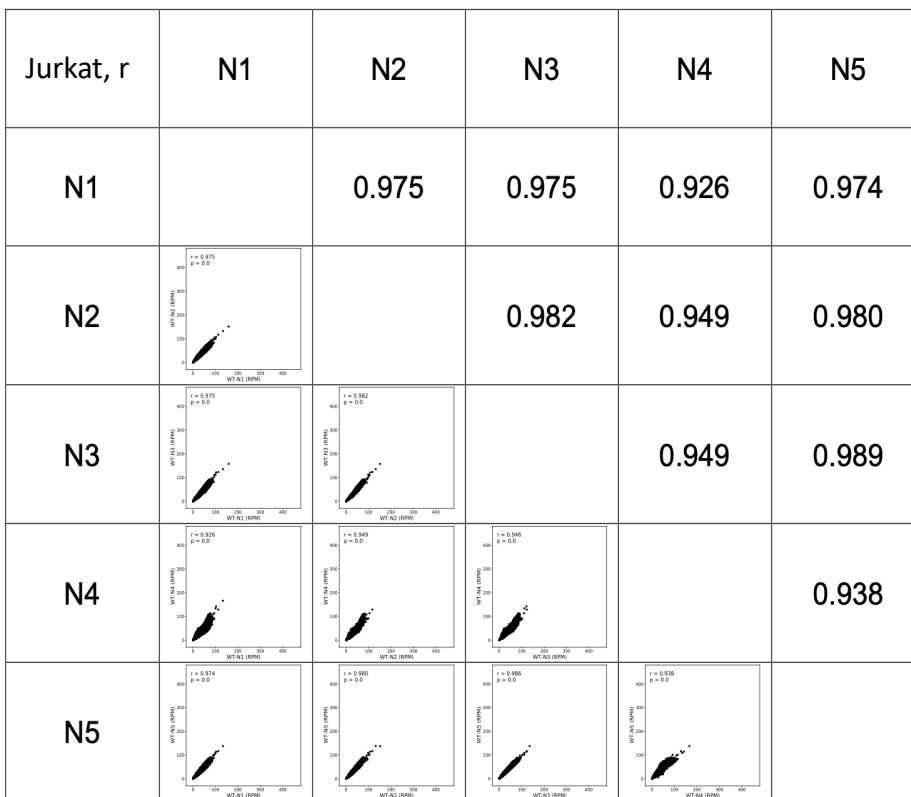

**Figure S1. Reproducibility of genome-wide DSB mapping/sequencing in MCF10A (A) and Jurkat (B) cells.** Scatter plot of genome-wide DSB mapping/sequencing reads from biological replicates (untreated N1-N4 for MCF10A cells, Table S1; and N1-N5 for Jurkat cells, Table S2) show a strong correlation (Pearson's correlation  $r = 0.803-0.942$  for MCF10A,  $r = 0.926-0.989$  for Jurkat,  $p \sim 0$ ). Read-normalized coverage for each preparation was calculated for 100kb genome-wide, non-overlapping windows ( $n = 30,895$ ), and Pearson's correlation was calculated.

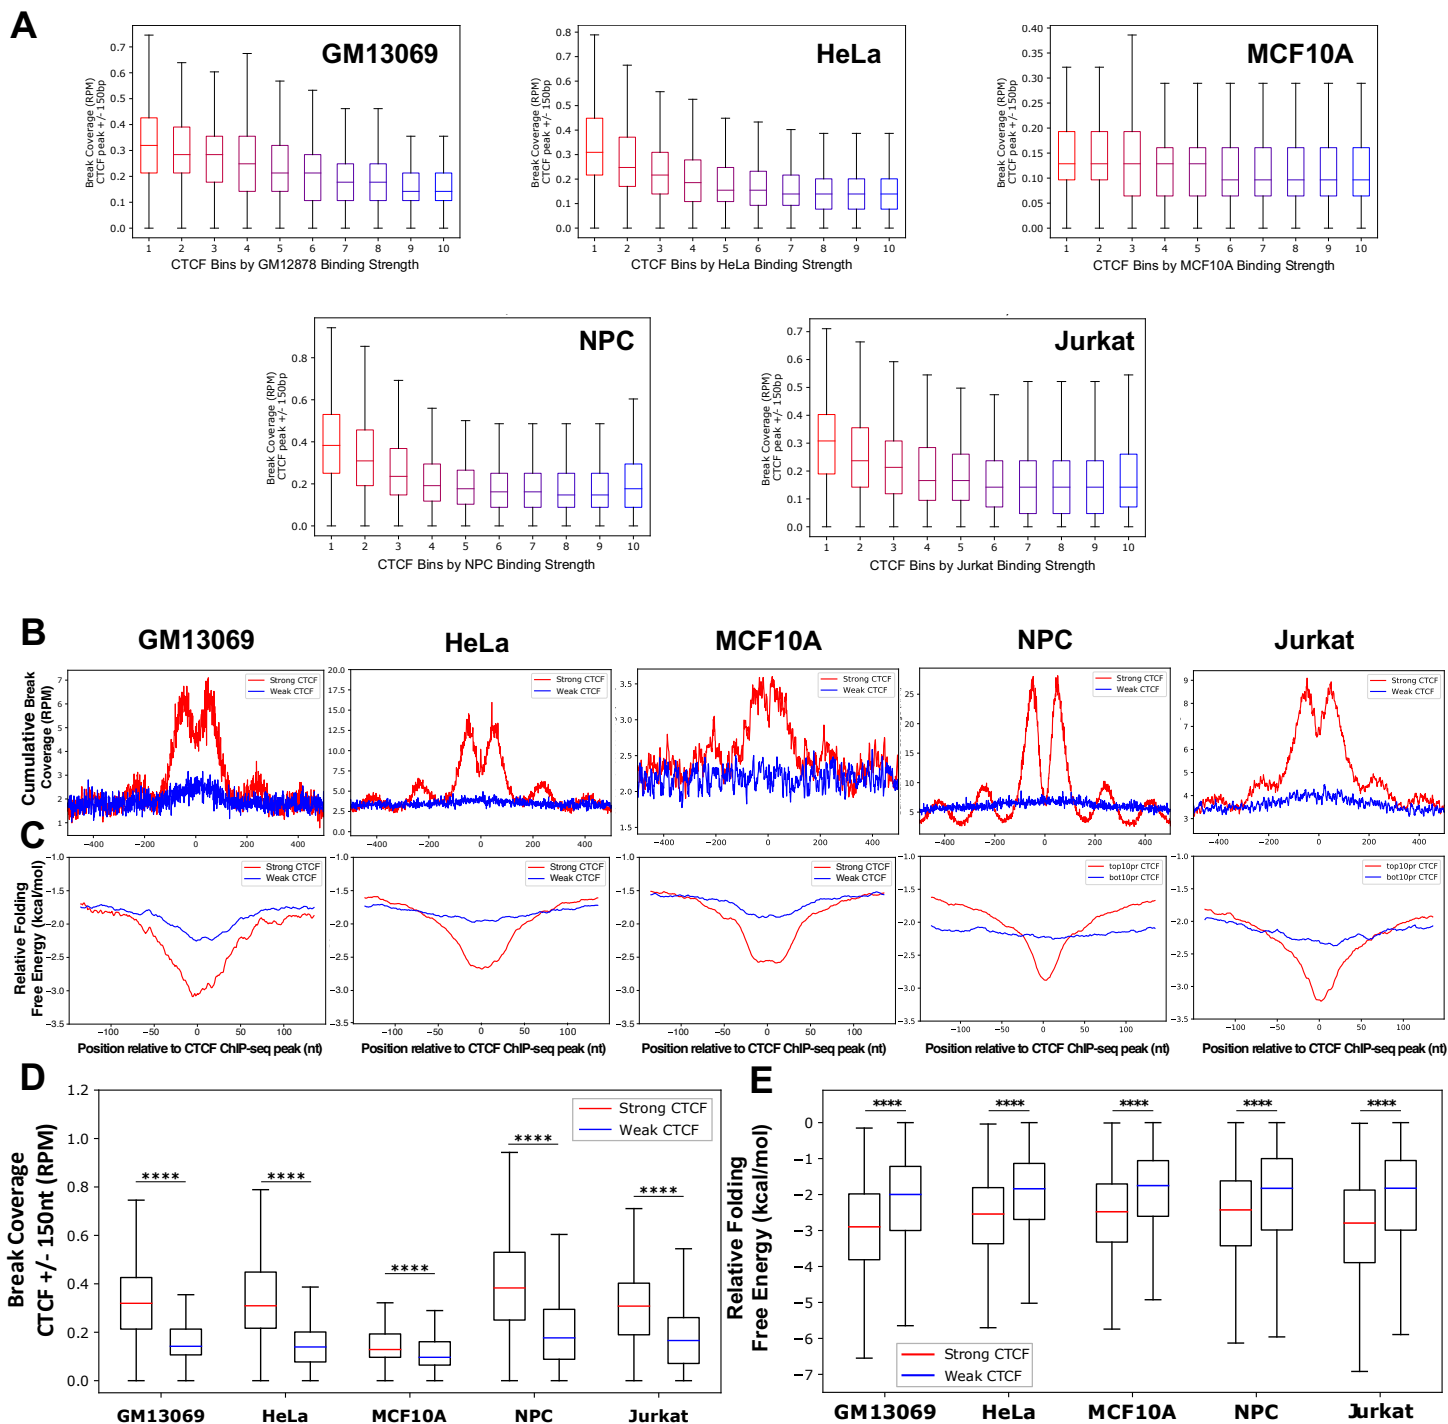

**Figure S2. DSBs are significantly enriched at strong CTCF binding sites in five cell types, and alternative DNA secondary structures are also significantly present at these sites. (A)** Mapped DSBs in five untreated cell lines are enriched in stronger CTCF binding sites and medians decrease with CTCF binding strength ( $\pm$  150 bp, RPM). **(B)** DSBs are enriched at the top 10% strongest CTCF binding sites (strong, red), but not at the 10% weakest CTCF binding sites (weak, blue) in untreated GM13069 ( $n = 4019$ ), HeLa ( $n = 6911$ ), MCF10A ( $n = 6011$ ), NPC ( $n = 9841$ ), and Jurkat ( $n = 6820$ ) cells, as demonstrated by cumulative DSB coverage (RPM, Reads Per Million) at these sites. **(C)** DNA sequences around strong CTCF binding sites (red,  $\pm$  150 nt) form more energetically favorable structures ( $\Delta G$ , kcal/mol) than sequences around weak CTCF binding sites (blue,  $\pm$  150 nt), as determined by folding predictions of single-stranded DNA using ViennaRNA with DNA thermodynamic parameters and a 30 nt sliding window with a 1 nt step; a low  $\Delta G$  (kcal/mol) indicates sequences are more favorable to form alternative DNA secondary structure. **(D)** Read-normalized DSB coverage (RPM, reads per million) was significantly greater at the strong (red) versus the weak (blue) CTCF binding sites ( $\pm$  150 nt) in each cell line. **(E)** Relative folding free energy was significantly more favorable at the strong (red) versus the weak (blue) CTCF binding peaks ( $\pm$  150 nt) for each cell line. Boxes denote 25<sup>th</sup> and 75<sup>th</sup>-percentiles, middle lines show medians, and whiskers span from 5% to 95%; \*\*\*\* indicates  $p \sim 0$ ; two-sample, Kolmogorov-Smirnov test.

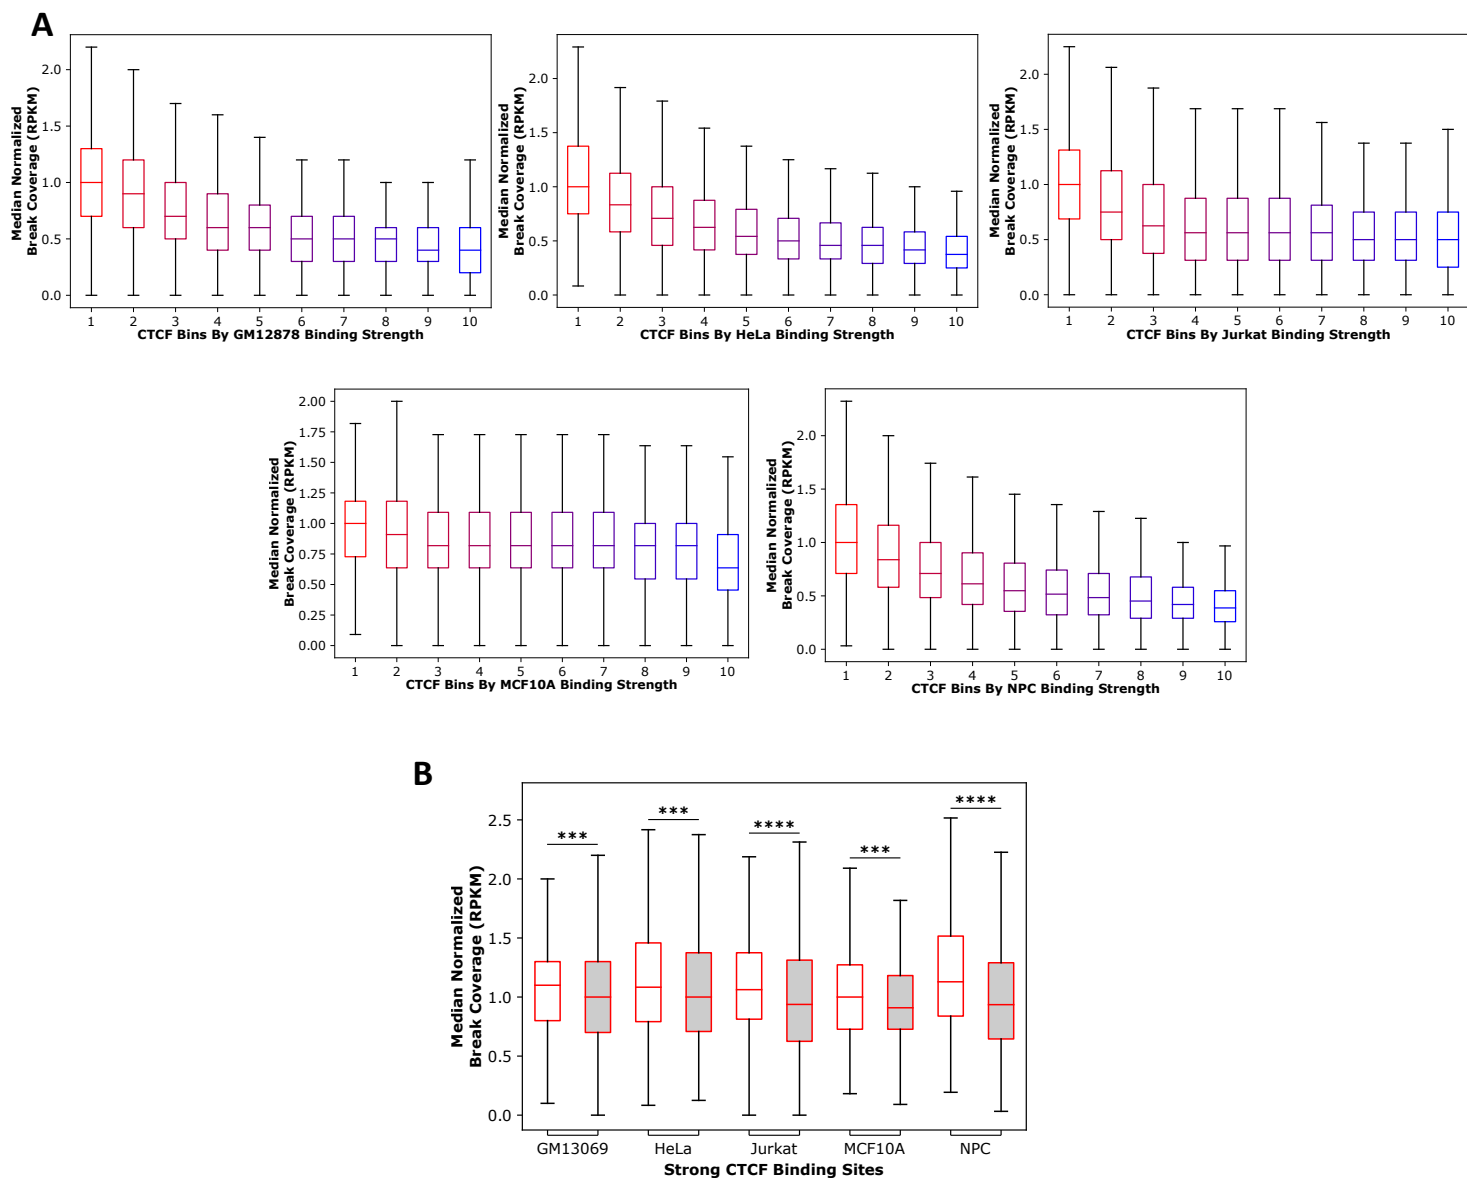

**Figure S3. Strong CTCF binding sites are enriched for DSBs and shared between cell lines. (A)** Mapped DSBs in untreated cells, normalized to median value of the top 10% CTCF (Bin 1) for each cell line, are enriched in strong CTCF binding sites and medians decrease with CTCF binding site strength assessed across the union set of CTCF sites from the five cell lines (RPKM, Reads Per Kilobase per Million) ( $n = 6884$  per bin). We created the union set of sites between five cell lines resulting in 68,841 CTCF binding sites, and then these sites were divided into deciles based on the binding strength determined by the DiffBind 3.0 R package in each cell line. **(B)** Common strong CTCF binding sites (white,  $n = 2100$ ) present in strongest 10% binding in five cell lines as assessed from the union CTCF binding site set, show greater DSB enrichment than the non-common strong CTCF binding sites (grey,  $n = 4784$ ) for each cell line (RPKM, Reads Per Kilobase per Million). Boxes denote 25<sup>th</sup> and 75<sup>th</sup>-percentiles, middle lines show medians, and whiskers span from 5% to 95%; \*\*\* indicates  $p < 0.001$ , \*\*\*\* indicates  $p \sim 0$ , Kruskal-Wallis with Dunn post-hoc test.



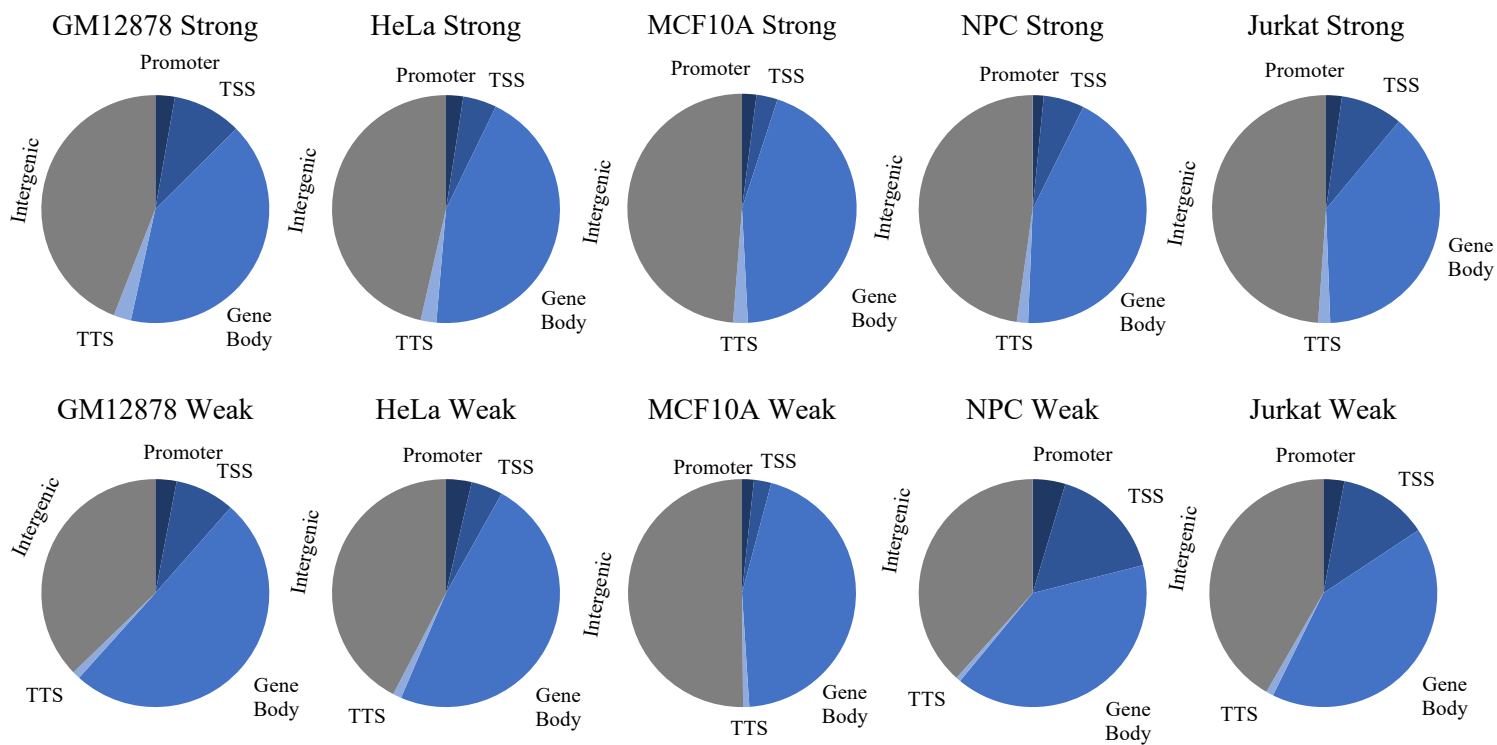

**Figure S4. Distribution of strong (top 10%) and weak (bottom 10%) CTCF binding sites among genic and intergenic sites do not explain DSB enrichment.** Strong (top) and weak (bottom) CTCF binding sites for GM12878 (n = 4019), HeLa (n = 6911), MCF10A (n = 6011), NPC (n = 9833), and Jurkat (n = 6820) were annotated for genomic features [promoter, transcription start site (TSS), gene body, transcription termination site (TTS), and intergenic regions]. The definitions used for each genomic feature was described in the Materials and Methods section under “Genomic region definitions”.

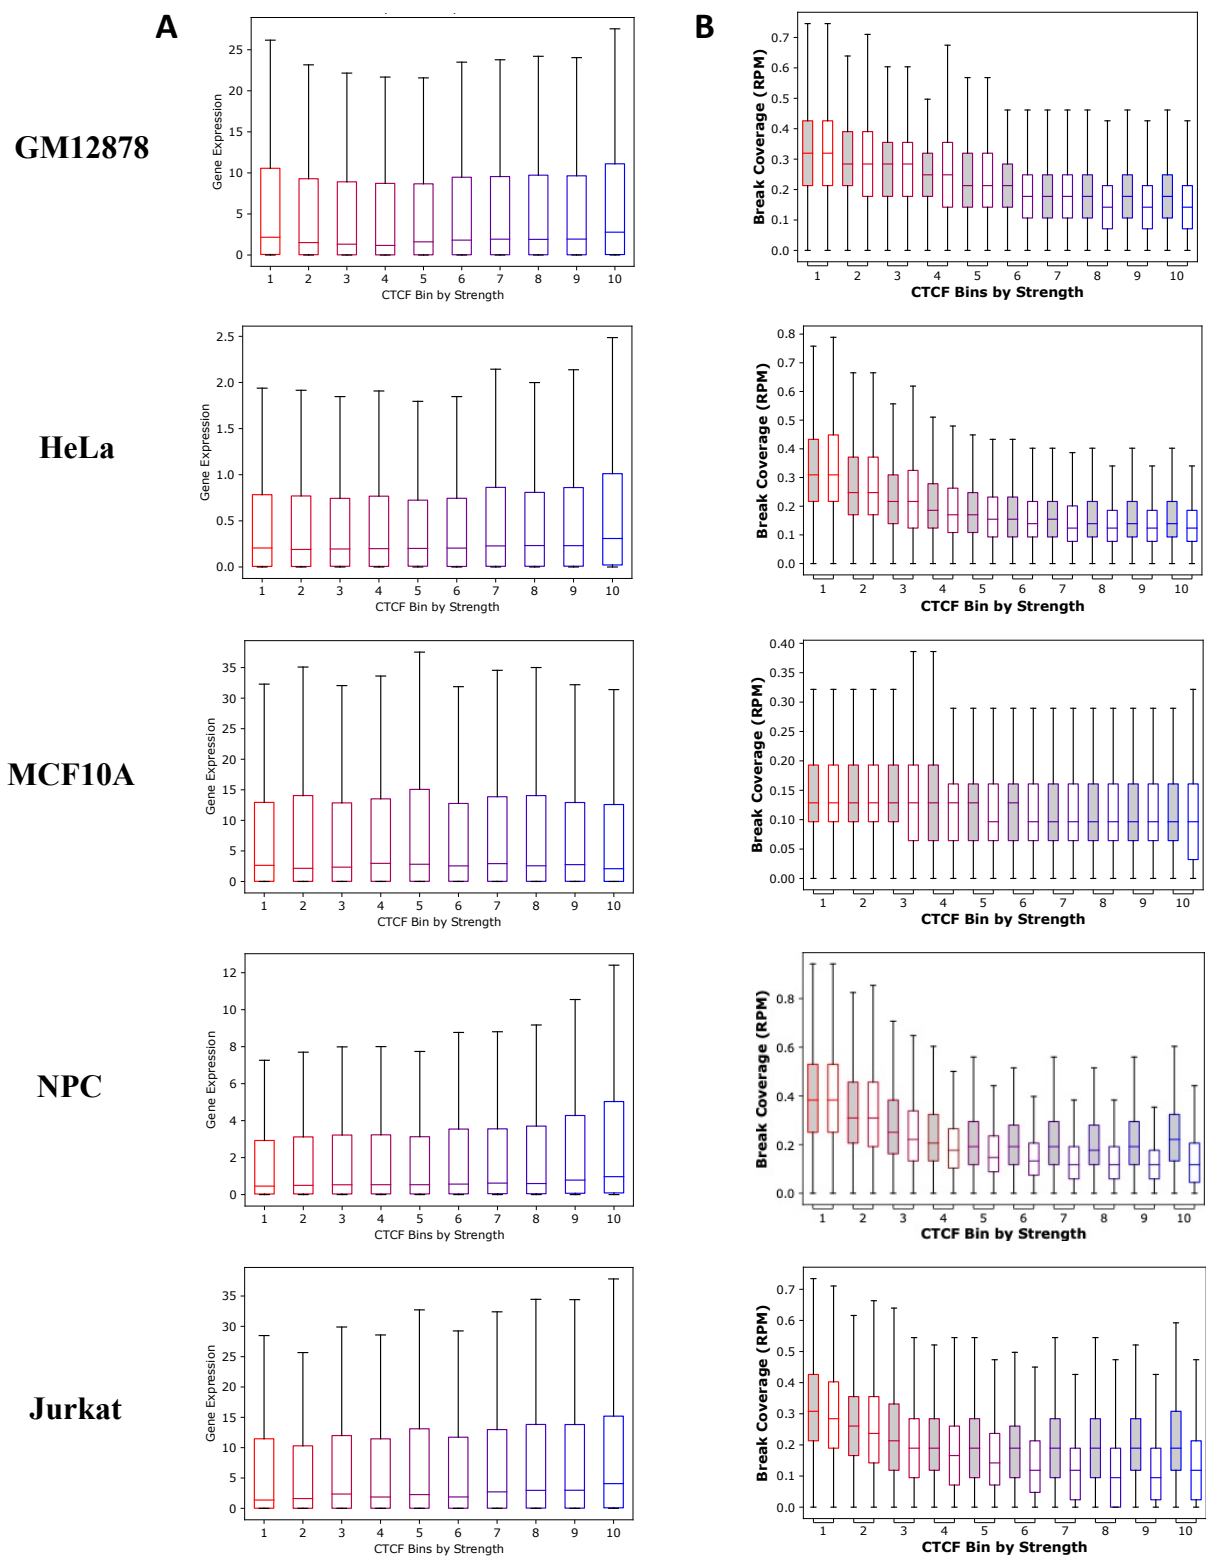

**Figure S5. No differences in gene expression were observed among genic CTCF binding sites binned by CTCF binding strength, and gene expression does not cause increased DSBs in strong CTCF binding sites. (A)** Gene expression medians between bins are not higher in strong CTCF binding sites compared to weak sites in all five cell lines. **(B)** Strong CTCF binding sites are not differently enriched for DSBs between genic (grey) and intergenic (white) distributions. Weak CTCF binding sites do show enriched DSBs in genic sites compared to intergenic sites in five cell lines (RPM, Reads Per Million). Boxes denote 25<sup>th</sup> and 75<sup>th</sup>-percentiles, middle lines show medians, and whiskers span from 5% to 95%.

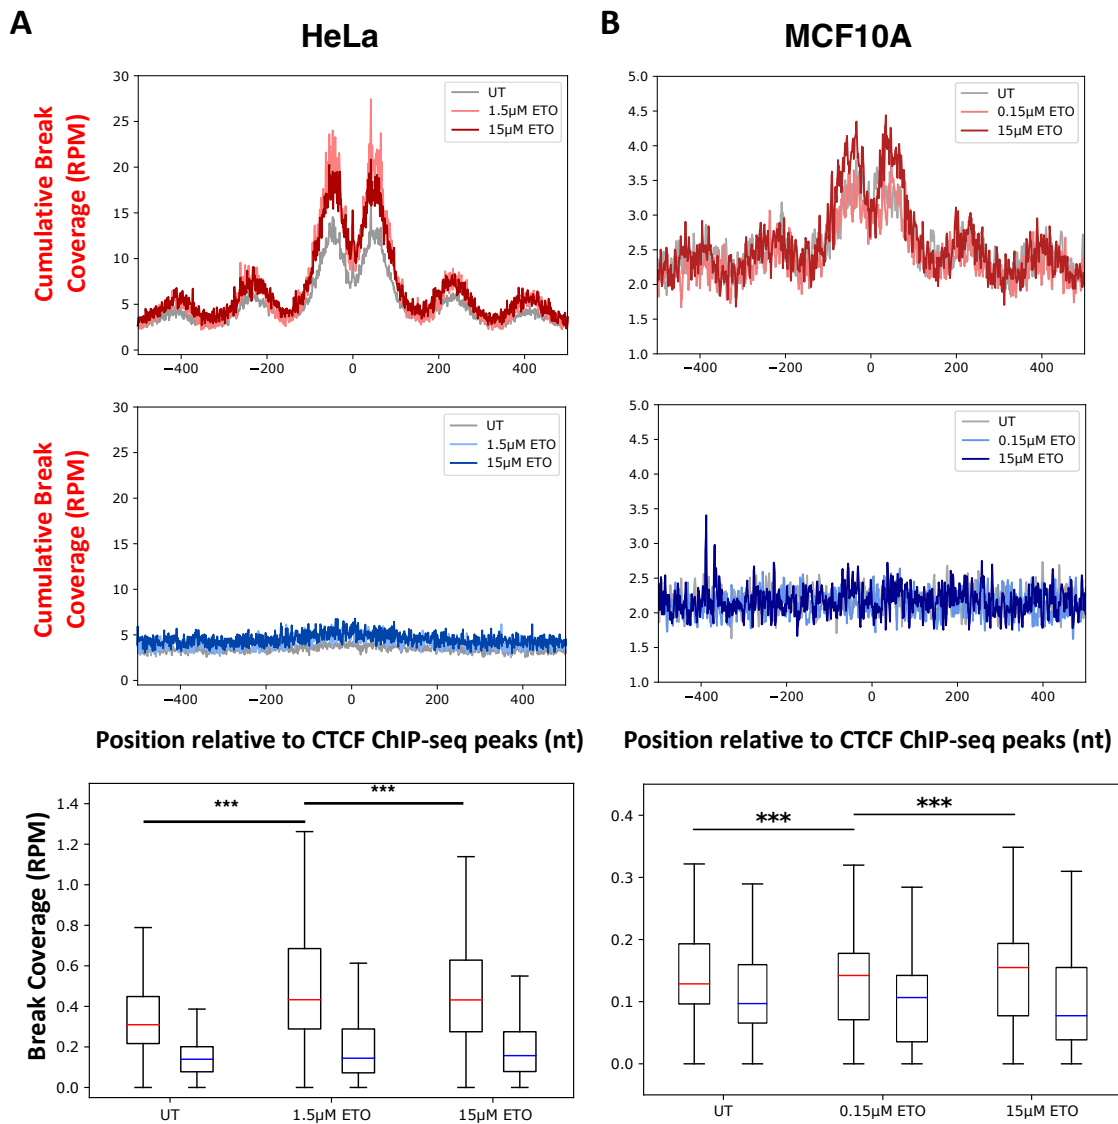

**Figure S6. DSBs are enriched at strong, but not weak, CTCF binding sites in a dose-dependent manner after exposure to etoposide.** Read-normalized DSBs (RPM) were mapped in untreated and etoposide-treated (0.15  $\mu\text{M}$ , 1.5  $\mu\text{M}$ , or 15  $\mu\text{M}$ ) **A**) HeLa and **B**) MCF10A cells at the strong (top 10%, top panels) and the weak (bottom 10%, middle panels) CTCF binding sites ( $n = 6911$  and  $6011$  binding sites for HeLa and MCF10A, respectively). Quantification of break coverage (RPM; bottom panels) at the strong (red) and the weak (blue) CTCF binding sites ( $\pm 150$  nt) for both MCF10 and HeLa demonstrated that etoposide treatment resulted in a significant increase of DSBs in a dose-dependent manner at strong sites. Boxes denote 25<sup>th</sup> and 75<sup>th</sup>-percentiles, middle lines show medians, and whiskers span from 5% to 95%; \*\*\* indicates  $p < 0.001$ ; two-sample, Kolmogorov-Smirnov test.

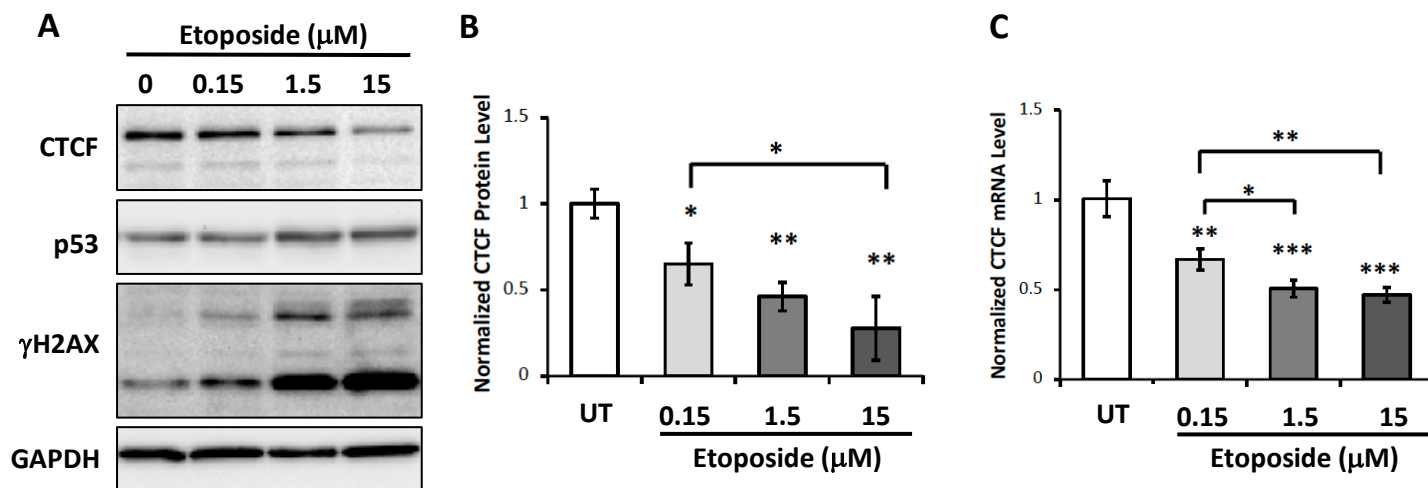

**Figure S7. Etoposide treatment decreases CTCF expression in MCF10A cells while increasing damage markers.** (A) Representative western blot showing CTCF (top), p53 (top-middle),  $\gamma\text{H2AX}$  (bottom-middle), and GAPDH (bottom) in MCF10A cells treated with etoposide at indicated doses for 24 hours. (B) Quantification of CTCF protein level normalized to GAPDH loading control and untreated samples ( $n = 3$ ). (C) Quantification of CTCF mRNA level from RT-qPCR normalized by the  $\Delta\Delta\text{Cq}$  method ( $n = 3$ ). Bar plots show means, and error bars indicate  $\pm$  standard deviation; All treatments compared to UT and each other, \* indicates  $p < 0.05$ , \*\* indicates  $p < 0.01$ , \*\*\* indicates  $p < 0.001$ , Student's t-test.

**A**

| Region  | Location                | Primer F (5' → 3')        | Primer R (5' → 3')      |
|---------|-------------------------|---------------------------|-------------------------|
| FHAD1   | chr1:15329390-15329459  | F: GGTCGACCTTCTTCAGCAC    | R: GACGTCCAGCACCACCTT   |
| DNAH11  | chr7:21551244-21551317  | F: TGGGATCAGGCTTGTCTTCT   | R: GGAAACAAGCTTGCAGATGG |
| SOS1 #1 | chr2:39120343-39120412  | F: AGCAGCTGCCCTACGAGTT    | R: AGCGCAGGCACCAGTAGT   |
| SOS1 #2 | chr2:39124616-39124691  | F: ACGCCAGTGTGAGTTCTTGA   | R: GCAGCCACAGTGATCCTTCT |
| ANKRD22 | chr10:88835697-88835768 | F: TCAGCGTTAGTGCGACTCTC   | R: GCTGTTCATTGCTGATCGTG |
| LIPA    | chr10:89217128-89217207 | F: TTTGACAAAGAATGTCTGAGCA | R: GCCAAATGAATTGAAATGGT |

**B**

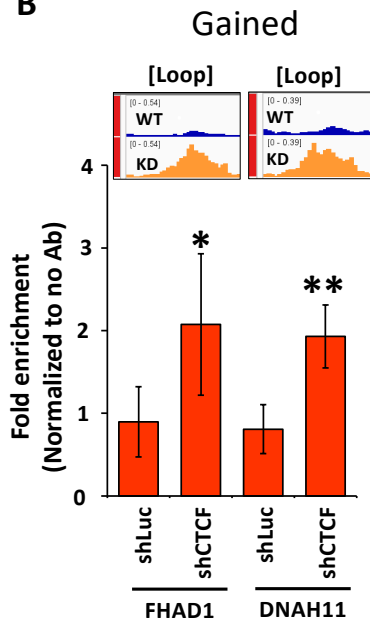

**C**

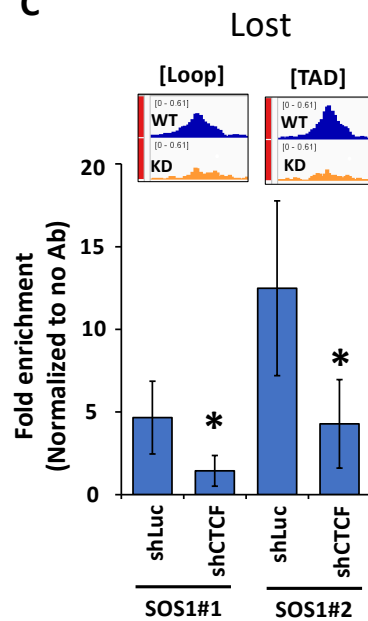

**D**

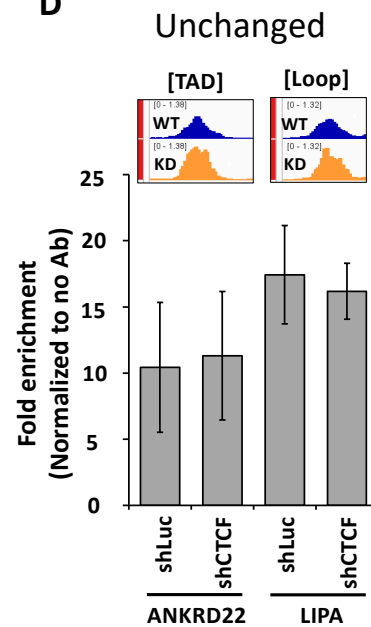

**Figure S8. Validation of lost, gained, and unchanged CTCF binding sites in shCTCF and shLuc MCF10A cells by CTCF ChIP-qPCR.** (A) The genomic coordinates of qPCR primers of the six CTCF binding sites. The primer-amplified regions contain CTCF motifs (FHAD1, DNAH11, LIPA) or are within 70 bp of CTCF motifs (SOS1#1, SOS1#2, ANKRD22). Fold enrichment of CTCF for gained (B), lost (C), and unchanged (D) CTCF binding sites. Top panels illustrate the CTCF-ChIP-seq data for individual locus [CTCF-WT (WT, blue) and CTCF-KD (KD, orange) in MCF10A cells], marked with the location at either TAD boundaries or loops. Bottom panels are CTCF fold enrichment normalized to no antibody (no Ab) control. At least three biological repeats were performed for each locus. Bar plots show means, and error bars indicate  $\pm$  standard deviation; All shCTCF samples were compared to respective shLuc samples, \* indicates  $p < 0.05$ , \*\* indicates  $p < 0.01$ , Student's t-test.

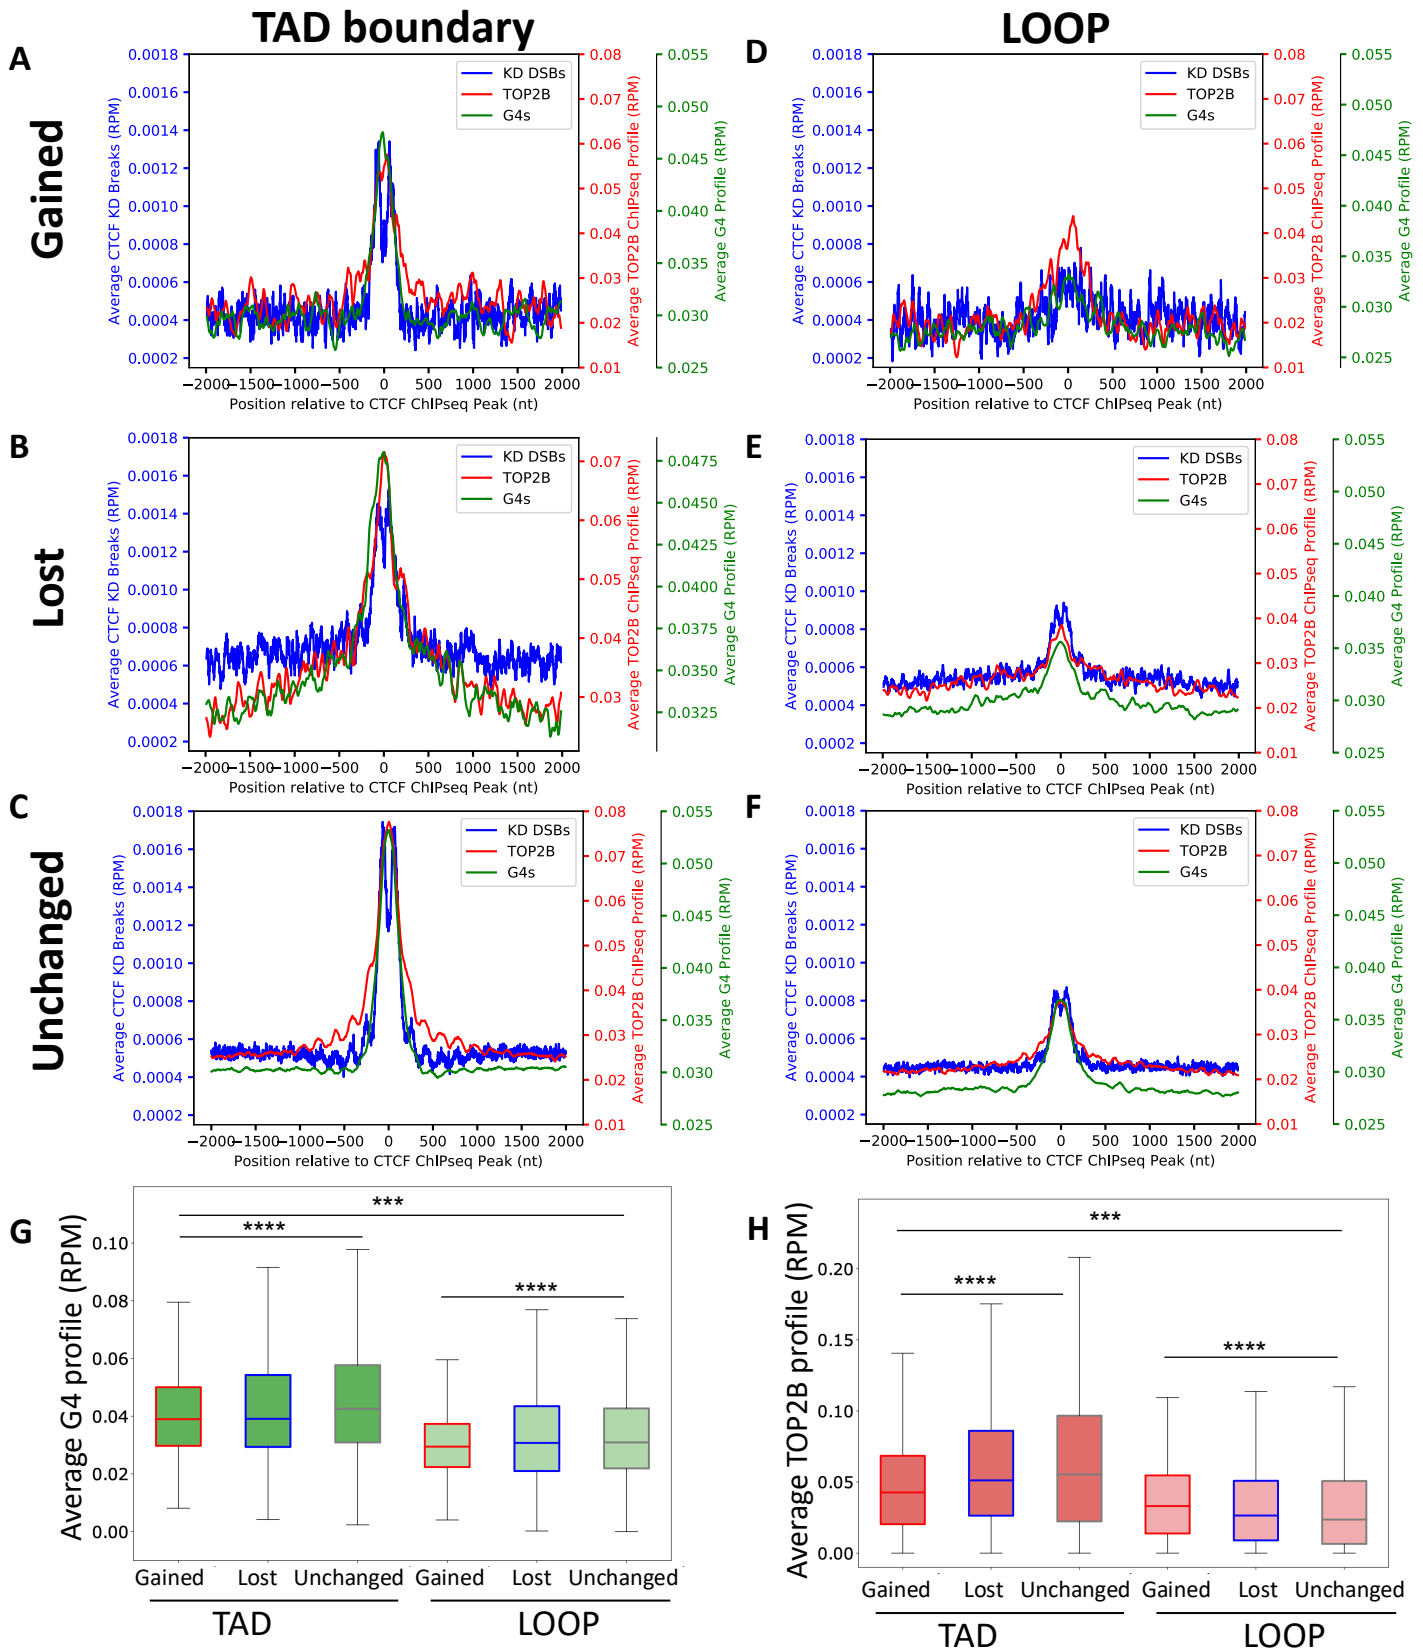

**Figure S9. TAD boundary-associated CTCF binding sites are enriched for DSBs, G-quadruplexes, and TOP2B binding, compared to loop-associated CTCF binding sites.** Average DSB profile from CTCF knockdown MCF10A (blue, RPM), average TOP2B binding (red, RPM), and average G-quadruplex profile (green, G4) are plotted over TAD boundary-associated (A) gained, (B) lost, and (C) unchanged CTCF binding sites and loop-associated (D) gained, (E) lost, and (F) unchanged CTCF binding sites. Quantification of G4 coverage (G) and TOP2B coverage (H) at TAD boundary- and loop-associated CTCF binding sites. Boxes denote 25<sup>th</sup> and 75<sup>th</sup> percentiles, middle lines show medians, and whiskers span from 5% to 95%; \*\*\* indicates  $p < 0.001$ , \*\*\*\* indicates  $p \sim 0$ , Kruskal-Wallis followed by Dunn post-hoc test. 14

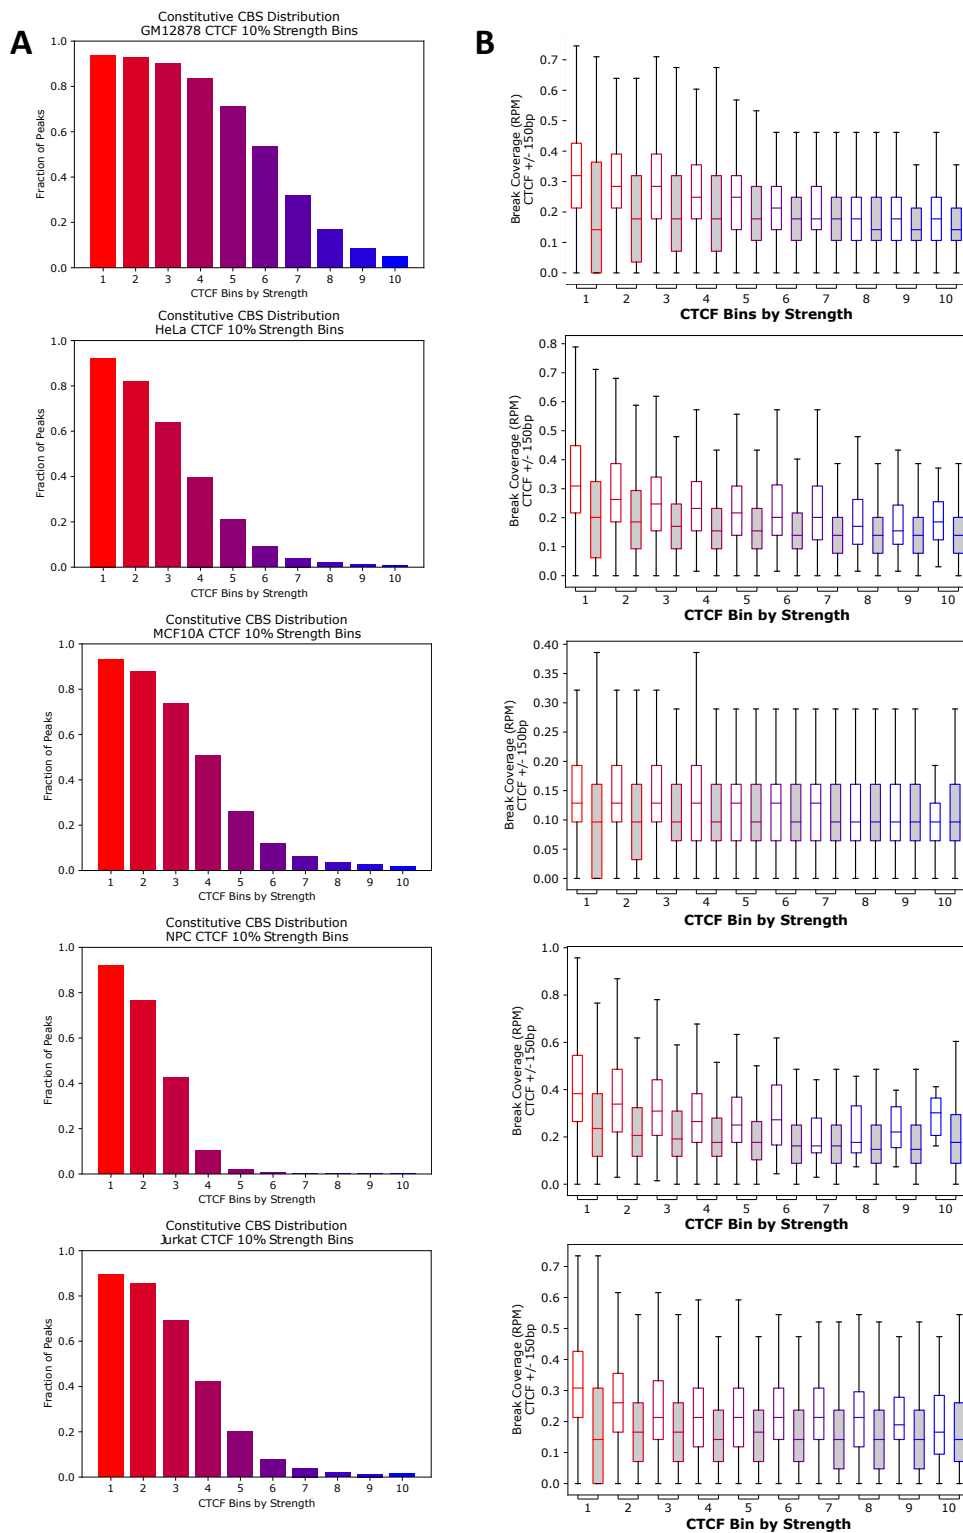

**Figure S10. TAD boundary-associated CTCF binding sites are enriched among strong CTCF binding sites and are enriched for DSBs compared to loop-associated CTCF binding sites. (A)** Distribution of TAD boundary-associated CTCF binding sites ( $n = 22,097$ ) in CTCF binding site bins based on CTCF binding strength in each cell line. **(B)** DSBs are enriched in TAD boundary-associated CTCF binding sites (white) compared to loop-associated CTCF binding sites (grey) across all decile strengths in five cell lines, while still showing binding strength differences (RPM,  $\pm 150$  bp). Boxes denote 25<sup>th</sup> and 75<sup>th</sup>-percentiles, middle lines show medians, and whiskers span from 5% to 95%.
